# Supplementary material for: Placement of oppositely charged aminoacids at a polypeptide termini determines the voltage-controlled braking of polymer transport through nanometer-scale pores
Source: PubMed Central journal article supplement (PMC4450769; doi:10.1038/srep10419), 2015-06-01
Supplement: srep10419-s1.pdf [file srep10419-s1.pdf]

SUPPLEMENTARY INFORMATION FOR:

**Placement of oppositely charged aminoacids at a polypeptide termini determines the voltage-controlled braking of polymer transport through nanometer-scale pores**

Alina Asandei<sup>1#</sup>, Mauro Chinappi<sup>2#</sup>, Jong-kook Lee<sup>3</sup>, Chang Ho Seo<sup>3</sup>, Loredana Mereuta<sup>4</sup>, Yoonkyung Park<sup>5,\*</sup> and Tudor Luchian<sup>4,\*</sup>

<sup>1</sup> Department of Interdisciplinary Research, Alexandru I. Cuza University, Iasi, Romania

<sup>2</sup> Center for Life Nano Science, Istituto Italiano di Tecnologia, Rome, Italy

<sup>3</sup> Department of Bioinformatics, Kongju National University, Kongju, Korea

<sup>4</sup> Department of Physics, Alexandru I. Cuza University, Iasi, Romania

<sup>5</sup> Research Center for Proteineous Materials, Chosun University, Gwangju, South Korea

<sup>#</sup>These authors contributed equally to this work

<sup>\*</sup>Corresponding authors (y\_k\_park@Chosun.ac.kr, luchian@uaic.ro)

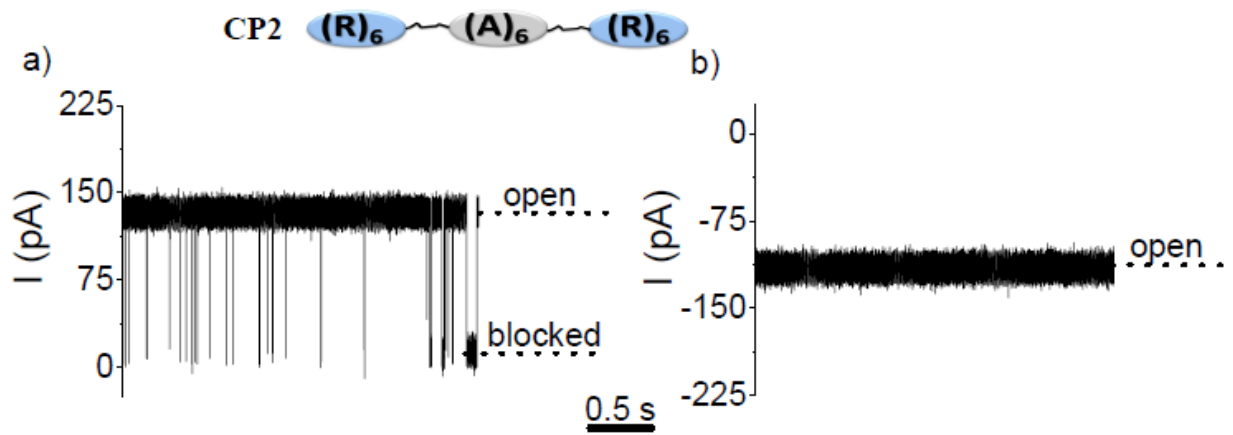

Fig. 1 SI Typical single-pore current recordings reflecting the CP2 (Ac-RRRRRRAAAAAARRRRRR-NH<sub>2</sub>) peptide interaction with the  $\alpha$ -HL pore immobilized in a lipid membrane, in an electrolyte containing 2 M KCl, 10 mM HEPES, pH=7.3, at  $\Delta V=+70$  mV (anel a) and  $\Delta V=-70$  mV (panel b). The bulk concentration of the peptide was 5  $\mu$ M. In panel a, downward spikes reflect reduction of pore current induced by the reversible association of a peptide with an open protein pore, giving rise to the ‘blocked’ state, whereas the state denoted by ‘open’ shows level of open-pore current before a peptide partitioned within the  $\beta$ -barrel. At negatively applied potentials (b) the peptide does not associate and block the  $\alpha$ -HL pore (see main text).

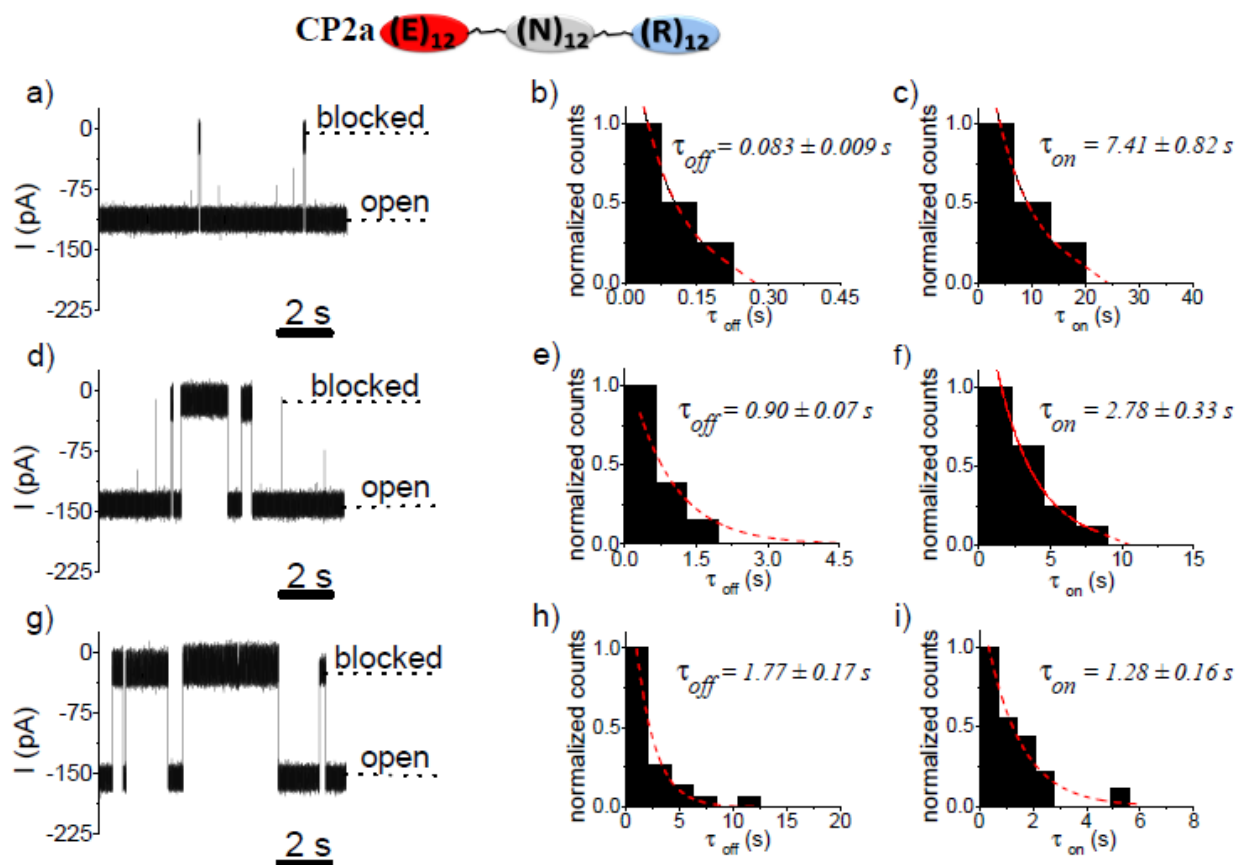

Fig. 2 SI Representative electrophysiology traces demonstrating the reversible interaction between CP2a peptides and a single  $\alpha$ -HL pore, seen as upwardly oriented ion current changes, measured at transmembrane potentials of  $\Delta V = -70$  mV (panel a),  $\Delta V = -90$  mV (panel d) and  $\Delta V = -100$  mV (panel g). The electrolyte added symmetrically on both chambers contained 2 M KCl, 10 mM HEPES, pH=7.3 was, and the peptide was added in the *trans* chamber at a bulk concentration of 5  $\mu$ M. Also shown are normalized mono-exponentially fitted distributions of blockade-events ( $\tau_{off}$ ) and inter-events durations ( $\tau_{on}$ ) characterizing the current blockades recorded at  $\Delta V = -70$  mV (panels b and c),  $\Delta V = -90$  mV (panels e and f) and  $\Delta V = -100$  mV (panels h and i).

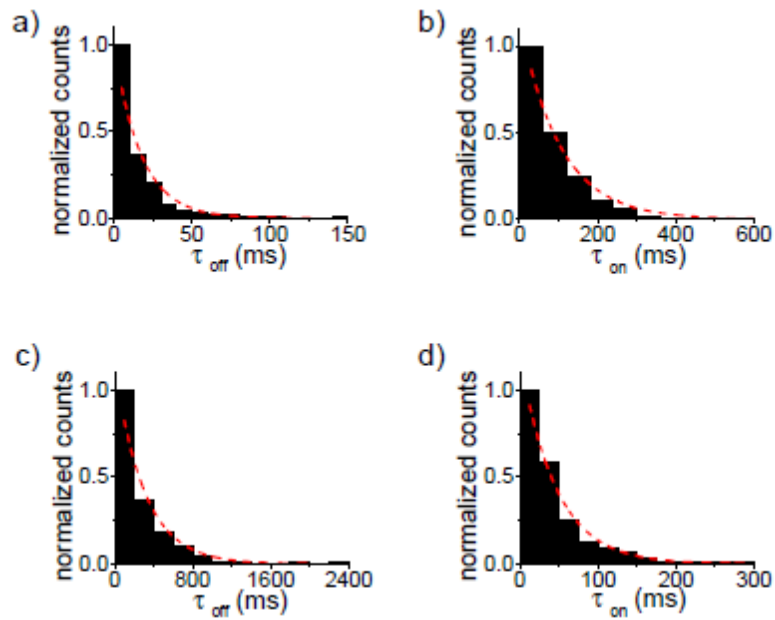

Fig. 3 SI Normalized mono- exponentially fitted distributions of blockade-events ( $\tau_{\text{off}}$ ) and inter-events durations ( $\tau_{\text{on}}$ ) characterizing the CP2a peptide-induced current blockades recorded across a single  $\alpha$ -HL pore, clamped at  $\Delta V = + 70$  mV (panels a and b) and  $\Delta V = + 100$  mV (panels c and d) (see main text).

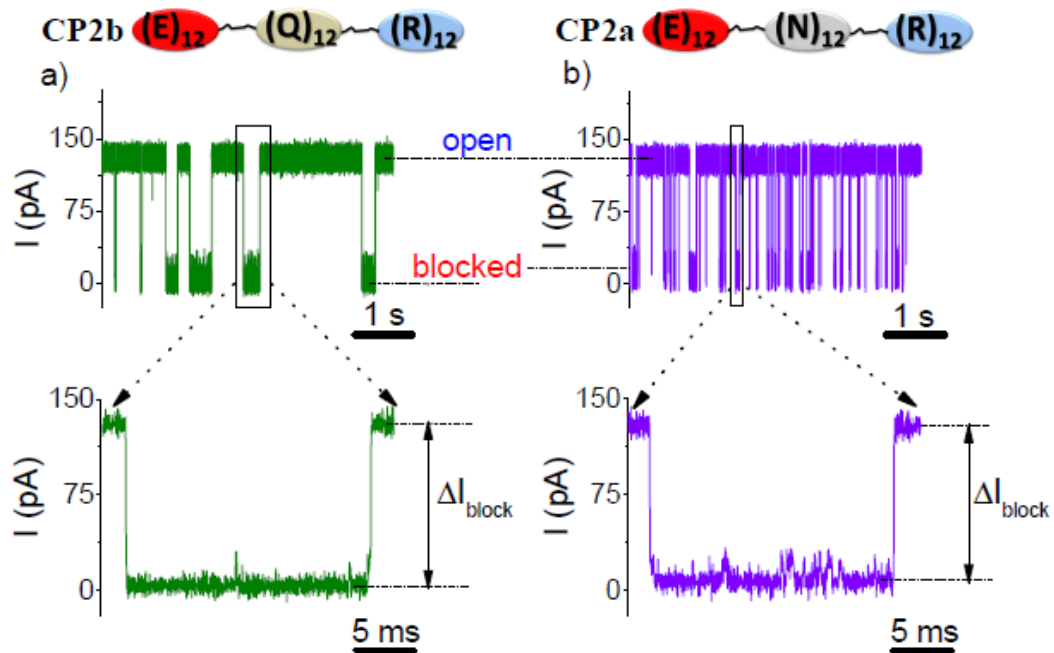

Fig. 4 SI Representative current recordings through a single  $\alpha$ -HL pore showing the transient pore blockades by incoming CP2b (panel a) or CP2a peptides (panel b), added in the trans side at a bulk concentration of 5  $\mu$ M, in an electrolyte containing 2 M KCl, 10 mM HEPES, pH=7.3, and an applied transmembrane potential  $\Delta V = 70$ mV. The extent of current block by a pore-residing peptide is shown in the zoomed-in panels below ( $\Delta I_{\text{block}}$  (CP2b) =  $-126.81 \pm -0.14$  pA,  $\Delta I_{\text{block}}$  (CP2a) =  $-119.11 \pm -0.31$  pA).

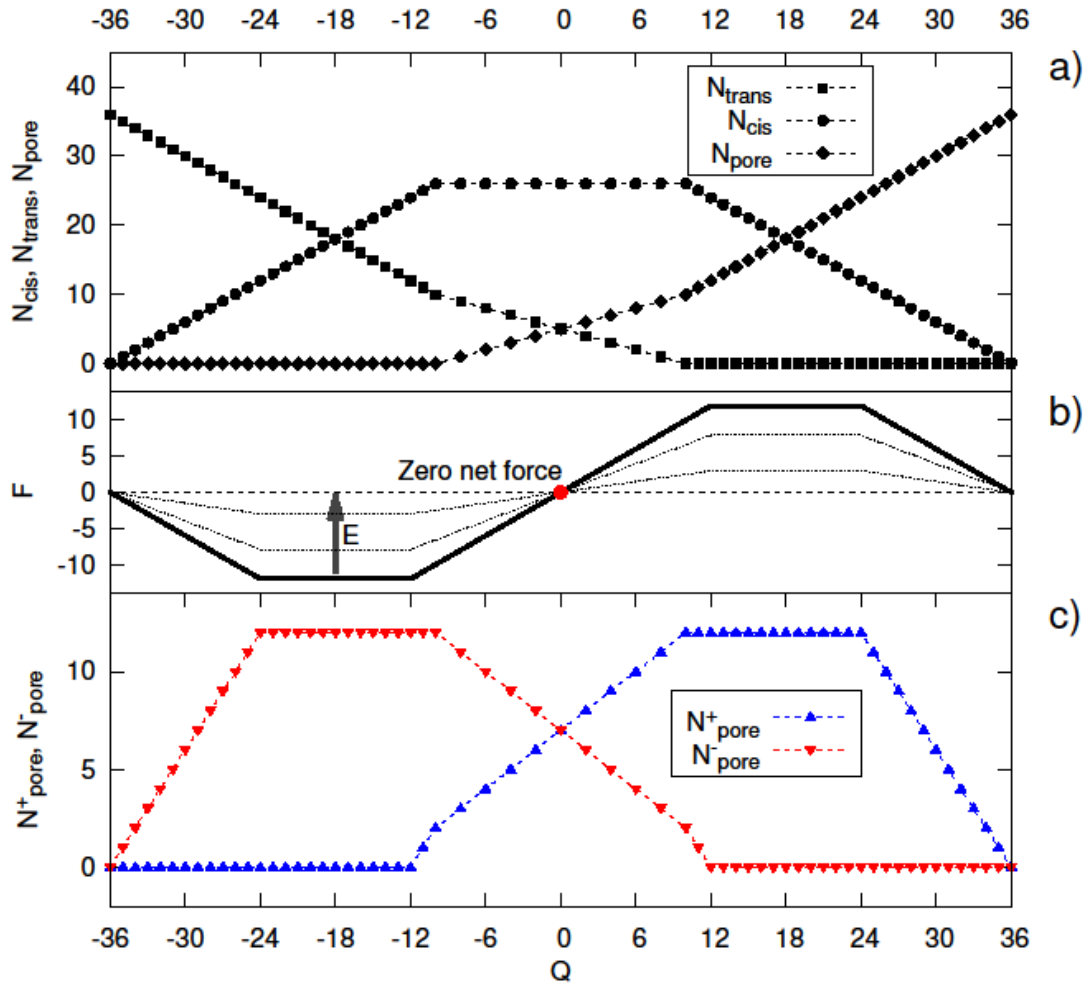

Fig. 5 SI In the analytical model presented in the text we select as progress variable  $Q = N_{cis} - N_{trans}$ . In the expressions for the free-energy  $G(Q)$  and the force  $F(Q)$ , the quantities  $N_{pore}^+$ ,  $N_{pore}^-$ ,  $N_{cis}$  and  $N_{trans}$  explicitly appear. Panels a and c report these quantities as function of  $Q$ . The resulting force  $F(Q)$  is plotted in panel b for three values of  $E$  (smaller electric field correspond to lower value of the force intensity). It is apparent that for  $Q=0$ , since  $N_{pore}^+ = N_{pore}^-$ ,  $F(Q) = 0$  (zero net force state).

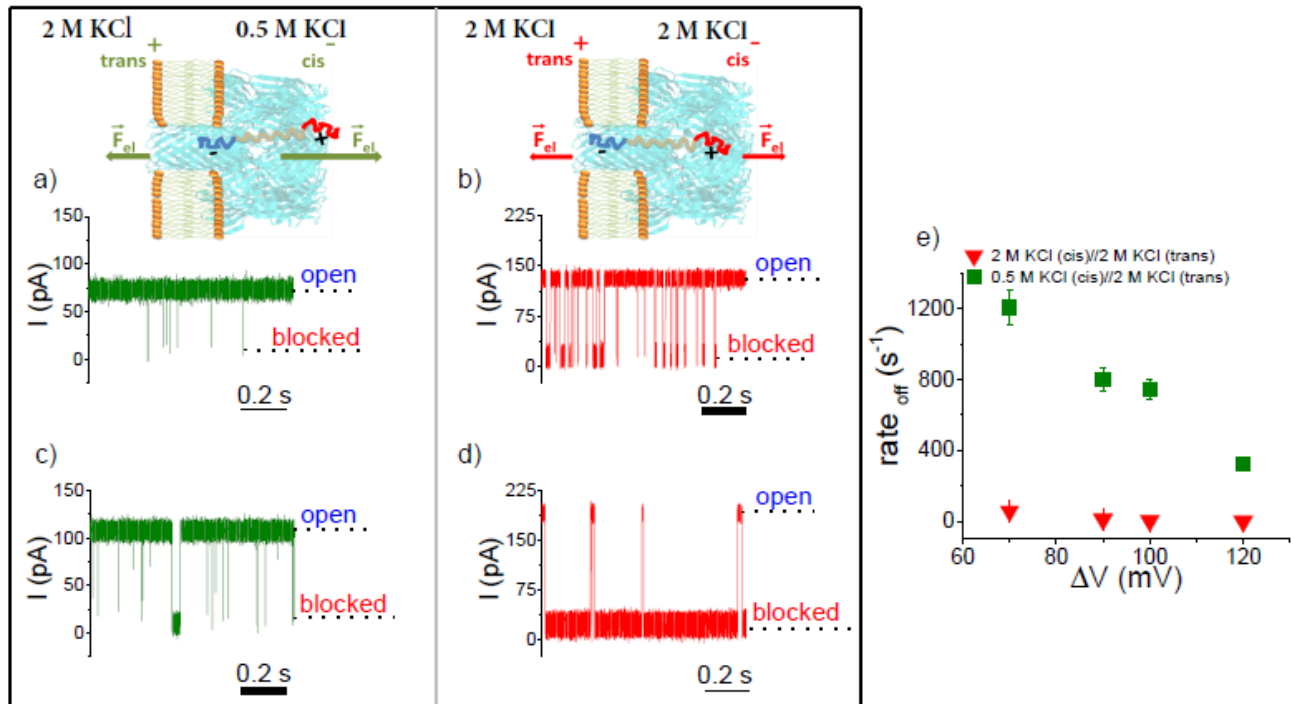

Fig. 6 SI Current blockades caused by reversible polypeptide:nanopore interactions in the presence of asymmetric and symmetric electrolyte concentrations and different applied potentials. a) and c)  $\Delta V = + 70$  mV and  $+ 100$  mV, respectively with 0.5 M KCl (*cis*) and 2 M KCl (*trans*). b) and d)  $\Delta V = + 70$  mV and  $+ 100$  mV, respectively with 2 M KCl (*cis*)/2 M KCl (*trans*). The polypeptide concentration in the bulk is 20  $\mu$ M, the solution has 10 mM HEPES at pH = 7.3. e) A comparison of the calculated dissociation rates ( $\text{rate}_{\text{off}}$ ) of the polypeptide from the nanopore for the asymmetric or symmetric solution conditions.
